# Supplementary material for: Temperature effects on metabolic scaling of a keystone freshwater crustacean depend on fish-predation regime
Source: Oxford University Press journal article supplement (doi:10.1242/jeb.232322), 2020-01-01
Supplement: jeb232322supp.pdf [file jeb232322supp.pdf]

**Table S1:** Metabolic rate (mL oxygen consumed per hour) and dry body mass (mg) of 710 individual amphipods (*Gammarus minus*) collected from six freshwater spring populations exposed to three different temperatures in the laboratory.

[Click here to Download Table S1](#)
